# Supplementary material for: Affordable Imaging Lab for Noninvasive Analysis of Biomass and Early Vigour in Cereal Crops
Source: PubMed Central journal article supplement (PMC5933035; doi:10.1155/2018/5713158), 2018-04-19
Supplement: 5713158.f1.pdf [file 5713158.f1.pdf]

Supplementary File 1: R script for preparing barcodes.

```
#Sticker printing size
```

```
#Size& Margin: No margins, fit into given physical size 68x30 millimeter for resolution 300dpi
```

```
library(grid)
```

```
library(png)
```

```
path_to_barcodes <- getwd()
```

```
output_filename <- paste0(Sys.Date(),"_", "barcodes.pdf")
```

```
barcode_files <- list.files(path_to_barcodes, pattern = "*.png|*.PNG", full.names = TRUE)
```

```
#def.par <- par(no.readonly = TRUE) # save default, for resetting...
```

```
# Initiate PDF device:
```

```
pdf(file = output_filename, onefile = TRUE, paper = 'a4', width = 8.27, height = 11.69, pagecentre = F)
```

```
par(mar=c(1,0.2,0.2,0),omi=c(0.1,0,1.1,0),xpd=NA)
```

```
par( mfrow = c(7,3) )
```

```
for(barcode in barcode_files){
```

```
  # Read png barcode:
```

```
  png <- png::readPNG(barcode)
```

```
  # Create dummy plot:
```

```
  plot(1:2,type="n",xlim=c(0,2),ylim=c(0,1),xaxt="n",yaxt="n",xlab="",ylab="", bty="n")
```

```
  # Plot png on dummy plot:
```

```
  rasterImage(png,0,0,2.2,1)
```

```
}
```

```
dev.off()
```

Supplementary File 2: Script for the software Digicamcontrol for imaging.

<!--The file must be saved with the extension ".dccscript". -->

```
<?xml version="1.0" encoding="UTF-8"?>
```

```
<dccscript>
```

```
<commands>
```

```
<loop loopcount="1">
```

```
<selectcamera cameranum="0"/>
```

```
<wait time="0" for="camera"/>
```

```
<capture/>
```

```
<wait time="1" for="camera"/>
```

```
<selectcamera cameranum="1"/>
```

```
<capture/>
```

```
<wait time="3" for="camera"/>
```

```
<selectcamera cameranum="0"/>
```

```
<capture/>
```

```
<wait time="3" for="camera"/>
```

```
<selectcamera cameranum="0"/>
```

```
<capture/>
```

```
<wait time="3" for="camera"/>
```

```
<selectcamera cameranum="0"/>
```

```
<capture/>
```

```
</loop>
```

```
</commands>
```

```
</dccscript>
```
